# Supplementary material for: Structures and optical properties of two phases of SrMgF4
Source: Royal Society of Chemistry journal article supplement (doi:10.1039/c4cp04689g), 2014-11-04
Supplement: c4cp04689g1.pdf [file c4cp04689g1.pdf]

## Supporting information

**Fig.S1.** Simulated XRD for LT and HT SrMgF<sub>4</sub> phases

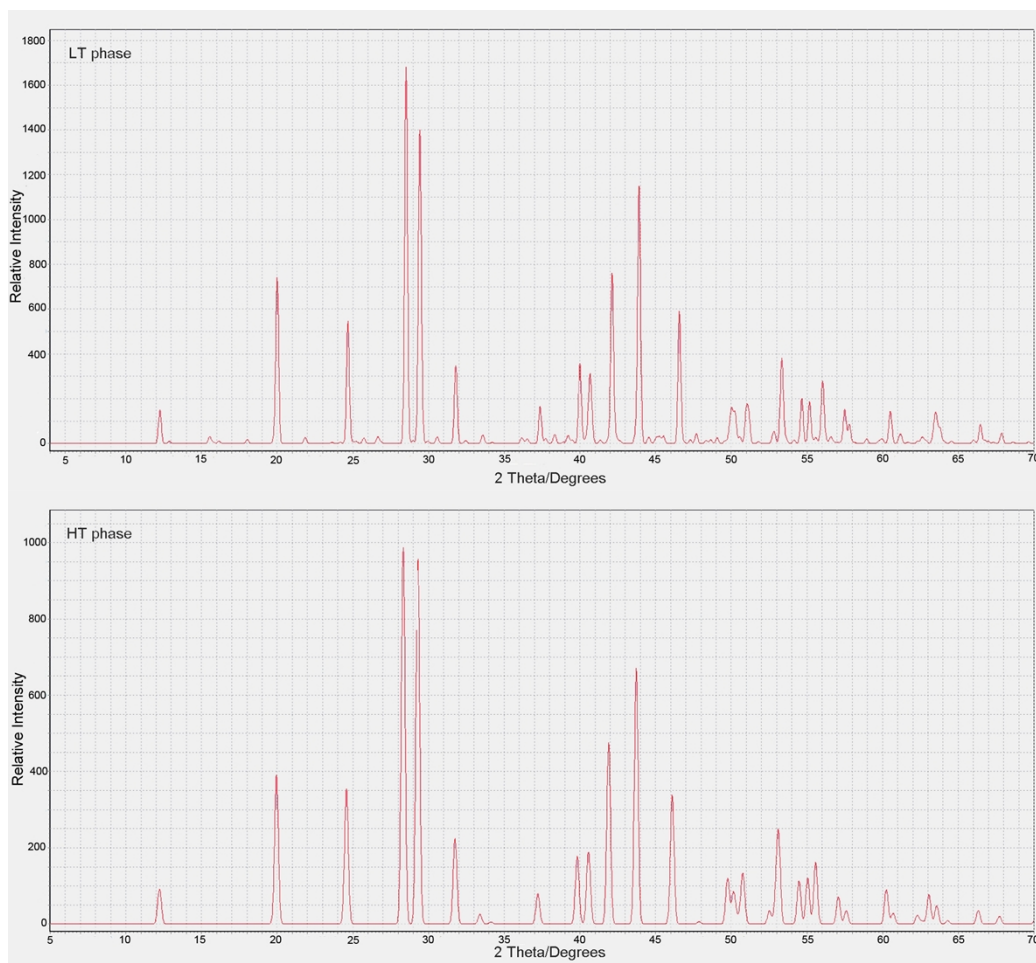

**Table S1 .** Main optical properties for wide-band nonlinear crystals

| №  | Crystal                                                             | Transmission range, $\mu\text{m}$ | SHG coefficients, pm/V                                                                        | Birefringence $\Delta n$ |
|----|---------------------------------------------------------------------|-----------------------------------|-----------------------------------------------------------------------------------------------|--------------------------|
| 1  | $\beta$ -BaB <sub>2</sub> O <sub>4</sub><br>(BBO)                   | 0.189-3.5                         | $\chi_{22}(0.53\mu\text{m})=2.6\text{pm/V}$<br>$\chi_{15}(1.06)=0.03, \chi_{31}=d_{33}=0.04$  | 0.12                     |
| 2  | LiB <sub>3</sub> O <sub>5</sub> (LBO)                               | 0.155-3.2                         | $\chi_{31}(1.06)=0.67, \chi_{32}=0.85, \chi_{33}=0.04$                                        | 0.05                     |
| 3  | KH <sub>2</sub> PO <sub>4</sub> (KDP)                               | 0.176-1.55                        | $\chi_{36}(1.06)=0.38$                                                                        | 0.05                     |
| 4  | NH <sub>4</sub> H <sub>2</sub> PO <sub>4</sub> (ADP)                | 0.184-1.3                         | $\chi_{36}(1.06)=0.46$                                                                        | 0.05                     |
| 5  | KD <sub>2</sub> PO <sub>4</sub> (DKDP)                              | 0.2-2.15                          | $\chi_{36}(1.06)=0.36$                                                                        | 0.05                     |
| 6  | CsLiB <sub>6</sub> O <sub>10</sub> (CLBO)                           | 0.18-2.75                         | $\chi_{36}(1.06)=0.74$                                                                        | 0.06                     |
| 7  | BiB <sub>3</sub> O <sub>6</sub> (BIBO)                              | 0.27-2.7                          | $\chi_{14}(1.079)=2.4, \chi_{16}(1.079)=2.8$<br>$\chi_{22}(1.079)=2.53, \chi_{36}(1.079)=2.4$ | 0.16                     |
| 8  | K <sub>2</sub> Al <sub>2</sub> B <sub>2</sub> O <sub>7</sub> (KABO) | 0.18-3.6                          | $\chi_{11}(1.064)=0.45$                                                                       | 0.07                     |
| 9  | KBeBO <sub>3</sub> F <sub>2</sub> (KBBF)                            | 0.155-3.7                         | $\chi_{11}(1.064)=0.49$                                                                       | 0.075                    |
| 10 | BaAlBO <sub>3</sub> F <sub>2</sub> (BABF)                           | 0.165-1.6                         | $\chi \sim 2d(\text{KDP})$                                                                    | 0.05                     |
| 11 | La <sub>2</sub> CaB <sub>10</sub> O <sub>19</sub> (LCB)             | 0.185-3.0                         | $d \sim 1.05$                                                                                 |                          |
| 12 | GdCa <sub>4</sub> O(BO <sub>3</sub> ) <sub>3</sub><br>(GCOB)        | 0.2-3.2                           | $\chi_{32}(1.064)=2.23$                                                                       | 0.03                     |
| 13 | YCa <sub>4</sub> O(BO <sub>3</sub> ) <sub>3</sub> (YCOB)            | 0.202-2.5                         | $\chi_{13}(1.064)=0.71, \chi_{32}(1.064)=2.00$                                                |                          |
| 14 | Li <sub>2</sub> B <sub>4</sub> O <sub>7</sub> (LB4)                 | 0.16-3.5                          | $\chi_{31}(1.064)=0.12, \chi_{33}(1.064)=0.47$                                                | 0.05                     |
| 15 | LiRbB <sub>4</sub> O <sub>7</sub>                                   | 0.187-3.47                        | $\chi_{14}(1.064)=0.45$                                                                       | 0.03                     |
| 16 | BaMgF <sub>4</sub>                                                  | 0.125-13                          | $\chi_{31}=0.021, \chi_{32}=0.039, \chi_{33}=0.015$                                           | 0.02                     |

Transparency range at “0” transmittance level.

All data were taken from<sup>11</sup> besides those for BaMgF<sub>4</sub><sup>3</sup>.
